# Supplementary material
Source: Springer Nature journal article supplement (https://www.springermedizin.de/resource/supplementary/12891_2011_1248_MOESM3_ESM.pdf/9507420)
Supplement: MOESM3 [file 9507420]

Identification

Screening

Eligibility

Included

Records identified through  
database searching  
(n = 2,410)

Additional records identified  
through other sources  
(n = 0)

Records after duplicates removed  
(n = 1,840)

Records excluded  
(n = 1,751 )  
- not post menopausal  
women: 612  
- not RCT vs placebo: 28  
- not a drug study: 708  
- not fracture study: 408

Records screened  
(n = 1,840)

Full-text articles  
assessed for eligibility  
(n = 89)

Full-text articles excluded,  
with reasons  
(n = 59)  
- not post menopausal  
women: 9  
- not RCT vs placebo 34  
Other: 16  
- abstract only (2), add-on  
therapies (1), extension  
studies (2), not enough data  
(9), longer study available (2)

Studies included in  
quantitative synthesis  
(meta-analysis)  
(n = 30)

|              |   |
|--------------|---|
| Alendronate  | 6 |
| Denosumb     | 1 |
| Etidronate   | 8 |
| Ibandronate  | 4 |
| Raloxifene   | 1 |
| Risedronate  | 6 |
| Strontium    | 2 |
| Teriparatide | 1 |
| Zoledronate  | 1 |
